# Supplementary material
Source: Springer Nature journal article supplement (https://www.springermedizin.de/resource/supplementary/13058_2010_2524_MOESM11_ESM.pdf/9701606)

# MaSC-enriched

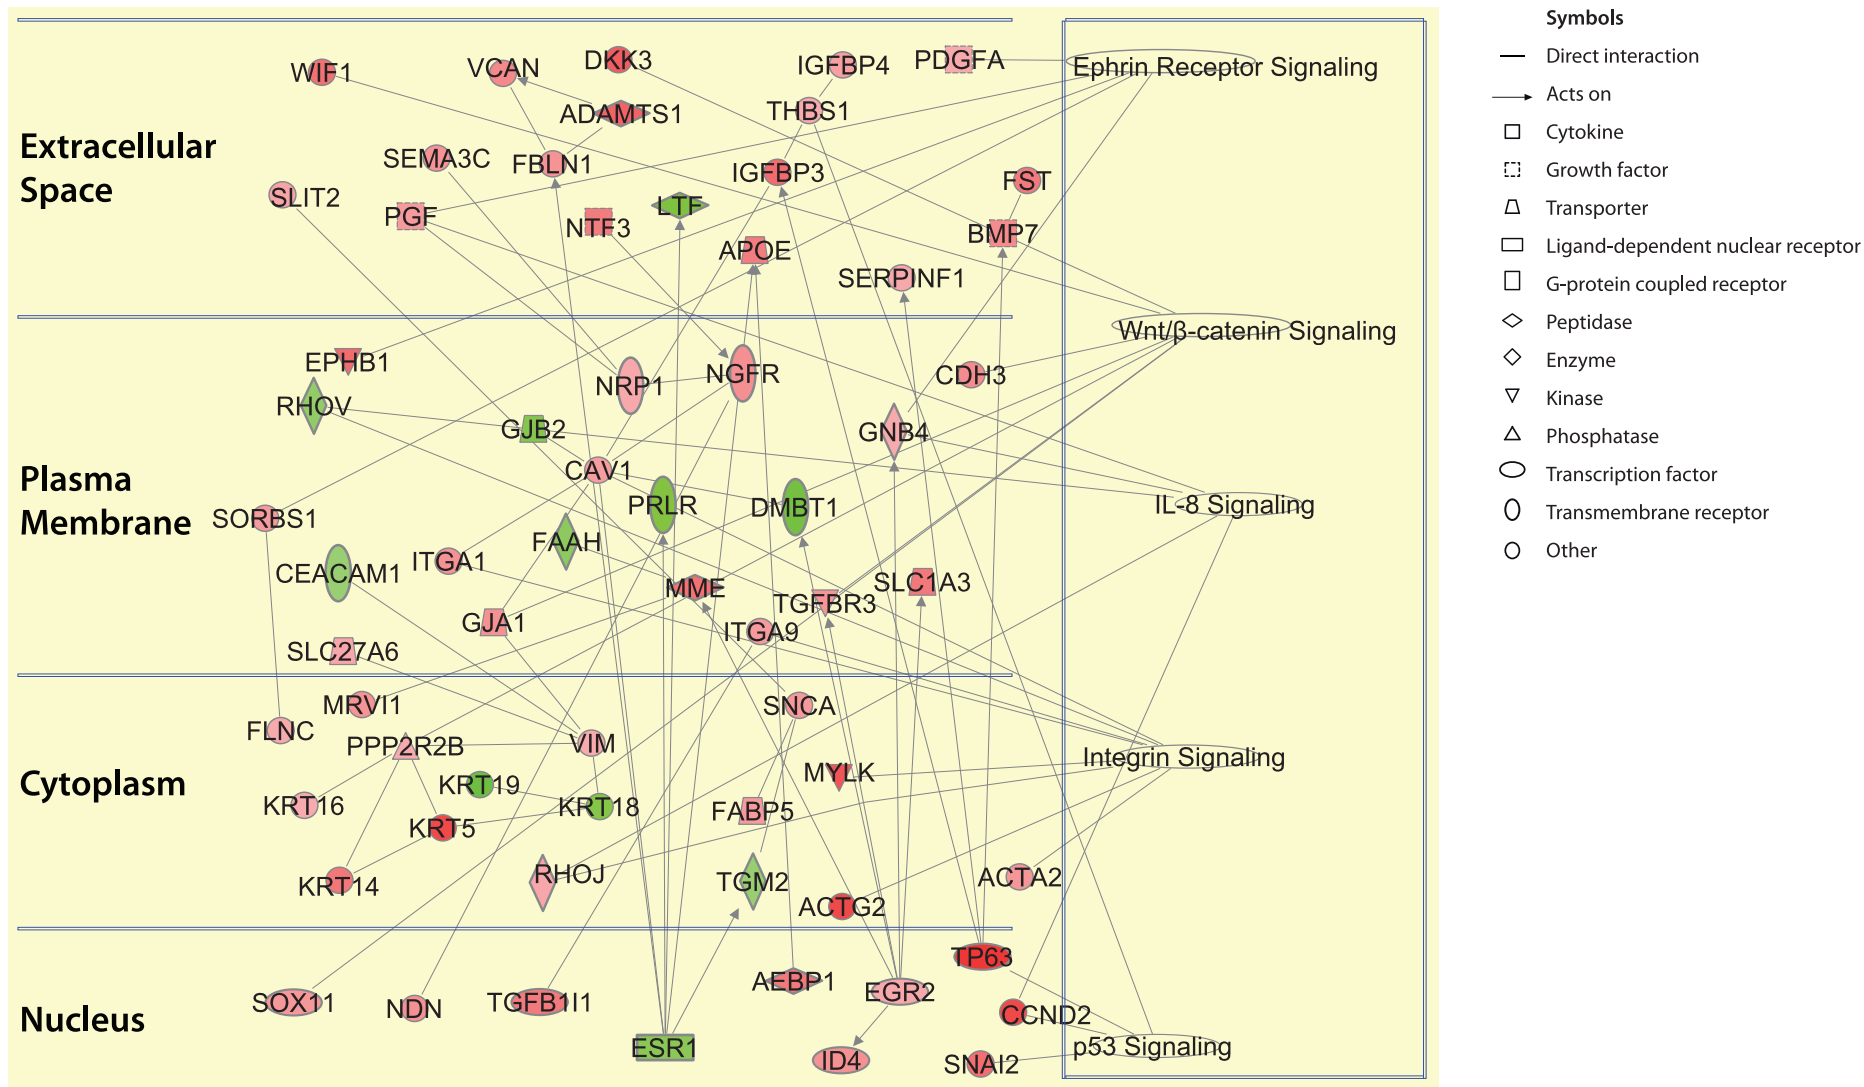

Supplement: MOESM11 [file 9701606]
